# Supplementary material for: Contrasting Nitrogen Fertilisation Rates Alter Mycorrhizal Contribution to Barley Nutrition in a Field Trial
Source: PubMed Central journal article supplement (PMC6831614; doi:10.3389/fpls.2019.01312), 2019-10-30
Supplement: Image_1.pdf [file Image_1.pdf]

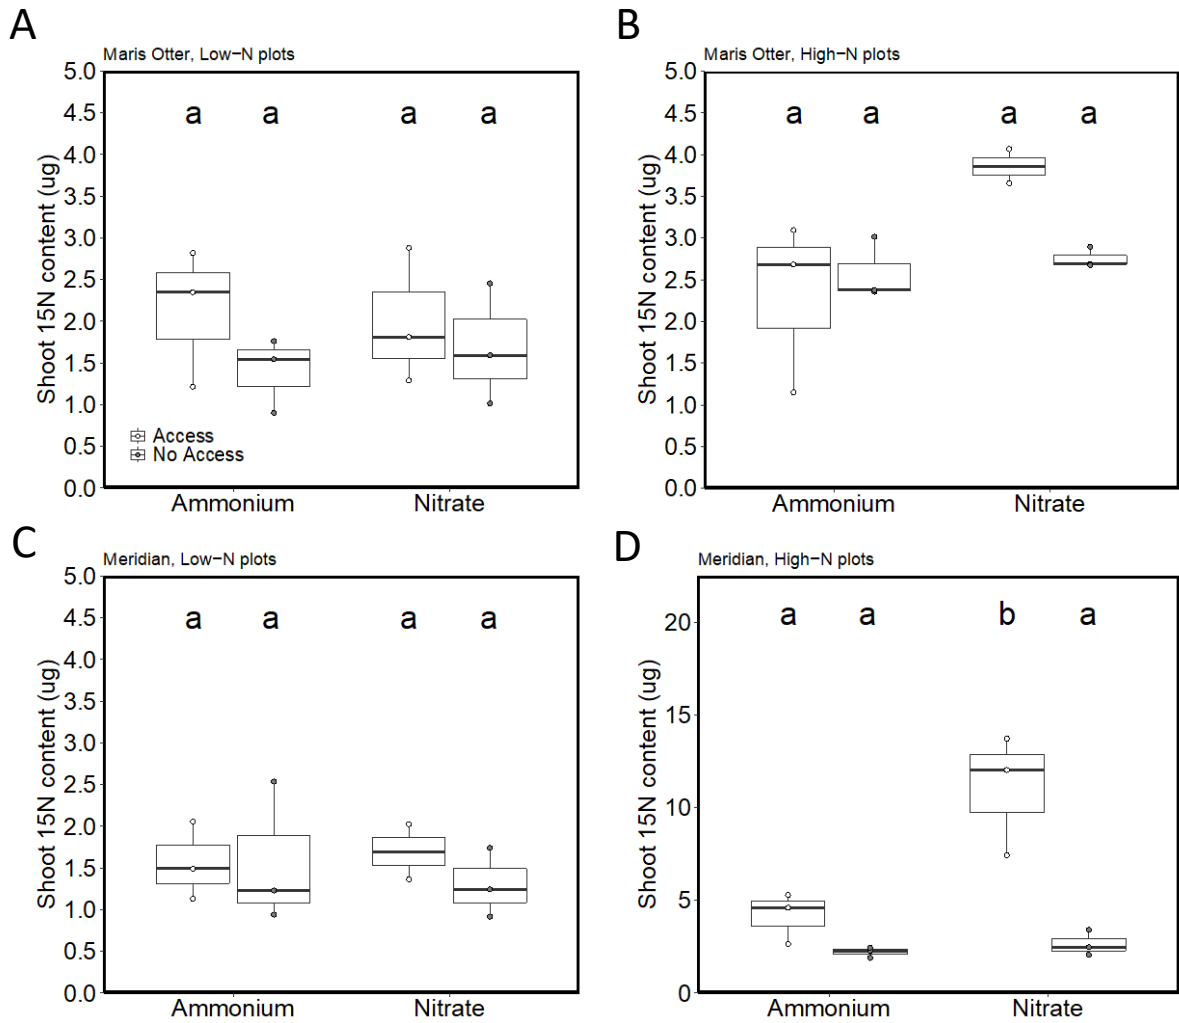

Supplementary Figure 1.  $^{15}\text{N}$  excess in aboveground tissue of Maris Otter (A,B) and Meridian (C,D) barley under high ( $280 \text{ kg Ha}^{-1}$ ) and low ( $60 \text{ kg Ha}^{-1}$ ) nitrogen fertilisation rates, where  $^{15}\text{N}$  is added as nitrate ( $\text{NO}_3^-$ ) or ammonium ( $\text{NH}_4^+$ ). White boxes represent the ‘mycorrhizal access’ treatment and grey boxes the ‘no mycorrhizal access’ treatment, where isotopic  $^{15}\text{N}$  labels were added to cores with  $20 \mu\text{m}$  mesh walls, or  $0.45 \mu\text{m}$  mesh walls, respectively.

Long Ashton nutrient solution preparation — Nitrate formulation

| Compound                 | Concentration in solution (mM) |
|--------------------------|--------------------------------|
| $K^{15}NO_3$             | 12                             |
| $Ca(NO_3)_2 \cdot 4H_2O$ | 4                              |
| $NaH_2PO_4 \cdot 2H_2O$  | 1.17                           |
| $MgSO_4 \cdot 7H_2O$     | 1.5                            |
| FeNaEDTA                 | 0.09                           |
| $MnSO_4 \cdot 4H_2O$     | 0.01                           |
| $ZnSO_4 \cdot 7H_2O$     | 0.001                          |
| $CuSO_4 \cdot 5H_2O$     | 0.001                          |
| $H_3BO_3$                | 0.05                           |
| $NaMoO_4 \cdot 2H_2O$    | 0.0005                         |
| NaCl                     | 0.1                            |

Long Ashton nutrient solution preparation — Ammonium formulation

| Compound               | Concentration in solution (mM) |
|------------------------|--------------------------------|
| $(^{15}NH_4)_2SO_4$    | 12                             |
| $K_2SO_4$              | 1.9                            |
| $CaCl_2 \cdot 2H_2O$   | 4                              |
| $NaHPO_4 \cdot 12H_2O$ | 1.28                           |
| $MgSO_4 \cdot 7H_2O$   | 1.5                            |
| FeNaEDTA               | 0.09                           |
| $MnSO_4 \cdot 4H_2O$   | 0.01                           |
| $ZnSO_4 \cdot 7H_2O$   | 0.001                          |
| $CuSO_4 \cdot 5H_2O$   | 0.001                          |
| $H_3BO_3$              | 0.05                           |
| $NaMoO_4 \cdot 2H_2O$  | 0.0005                         |
| NaCl                   | 0.1                            |
